# Supplementary material
Source: MDPI journal article supplement (https://www.mdpi.com/1424-2818/12/9/334)
Supplement: s1 [file s1]

## Supplementary Materials

Article

# Taxonomic implication of leaves morphological, anatomical, and chemical attributes of eight Apocynaceae taxa

Ahmed M. El-TaHER<sup>1</sup>, Abd El-Nasser G. El Gendy<sup>2</sup>, Jawaher Alkahtani<sup>3</sup>, Abdelsamed I. Elshamy<sup>4</sup>, and Ahmed M. Abd-ElGawad<sup>5\*</sup>

<sup>1</sup> Department of Agricultural Botany, Faculty of Agriculture, Al-Azhar University, Cairo, Egypt; [El.TaHER69@yahoo.com](mailto:El.TaHER69@yahoo.com)

<sup>2</sup> Medicinal and Aromatic Plants Research Department, National Research Center, 12622, Dokki, Giza, Egypt; [aggundy\\_5@yahoo.com](mailto:aggundy_5@yahoo.com)

<sup>3</sup> Department of Botany and Microbiology, College of Science, King Saud University, Riyadh 11451, Saudi Arabia; [jsalqahtani@ksu.edu.sa](mailto:jsalqahtani@ksu.edu.sa)

<sup>4</sup> Department of Natural Compounds Chemistry, National Research Center, 12622, Dokki, Giza, Egypt; [elshamynrc@yahoo.com](mailto:elshamynrc@yahoo.com)

<sup>5</sup> Plant Production Department (Plant Ecology), College of Food and Agriculture Sciences, King Saud University, P.O. Box 2460, Riyadh 11451, Saudi Arabia; [aibrahim2@ksu.edu.sa](mailto:aibrahim2@ksu.edu.sa)

\* Correspondence: [aibrahim2@ksu.edu.sa](mailto:aibrahim2@ksu.edu.sa), Tel.: +966562680864 (A.M.A-E.)

**Table S1.** List of different characters of the eight studied Apocynaceae plants.

| Character                                      | <i>A. obesum</i>                                                                      | <i>D. boliviensis</i> | <i>N. oleander</i> | <i>A. curassavica</i> | <i>C. procera</i> | <i>A. oblongifolia</i> | <i>C. carandas</i> | <i>T. nerifolia</i> |
|------------------------------------------------|---------------------------------------------------------------------------------------|-----------------------|--------------------|-----------------------|-------------------|------------------------|--------------------|---------------------|
| <b>MACRO-MORPHOLOGICAL CHARACTERS:</b>         |                                                                                       |                       |                    |                       |                   |                        |                    |                     |
| <b>I. Shape of leaves:</b>                     |                                                                                       |                       |                    |                       |                   |                        |                    |                     |
| 1                                              | Spathulate, present (1)/ absent (0)                                                   | 1                     | 0                  | 0                     | 0                 | 0                      | 0                  | 0                   |
| 2                                              | Ovate, present (1)/ absent (0)                                                        | 0                     | 1                  | 0                     | 0                 | 0                      | 0                  | 0                   |
| 3                                              | Oblong lanceolate, present (1)/absent (0)                                             | 0                     | 0                  | 1                     | 0                 | 0                      | 0                  | 0                   |
| 4                                              | Lanceolate, present (1)/ absent (0)                                                   | 0                     | 0                  | 0                     | 1                 | 0                      | 0                  | 0                   |
| 5                                              | Obovate, present (1)/ absent (0)                                                      | 0                     | 0                  | 0                     | 0                 | 1                      | 0                  | 0                   |
| 6                                              | Elliptic, present (1)/ absent (0)                                                     | 0                     | 0                  | 0                     | 0                 | 0                      | 1                  | 0                   |
| 7                                              | Linear, present (1)/ absent (0)                                                       | 0                     | 0                  | 0                     | 0                 | 0                      | 1                  | 0                   |
| <b>II. Leaf base shapes:</b>                   |                                                                                       |                       |                    |                       |                   |                        |                    |                     |
| 8                                              | Attenuate, (1)/ rounded (0)                                                           | 1                     | 0                  | 1                     | 1                 | 0                      | 1                  | 0                   |
| <b>III. Leaf apex shapes:</b>                  |                                                                                       |                       |                    |                       |                   |                        |                    |                     |
| 9                                              | Mucronate, present (1)/ absent (0)                                                    | 1                     | 0                  | 0                     | 0                 | 0                      | 0                  | 0                   |
| 10                                             | Acuminate, present (1)/ absent (0)                                                    | 0                     | 1                  | 0                     | 0                 | 1                      | 0                  | 1                   |
| 11                                             | Acute, present (1)/ absent (0)                                                        | 0                     | 0                  | 1                     | 1                 | 0                      | 0                  | 1                   |
| 12                                             | Obtuse, present (1)/ absent (0)                                                       | 0                     | 0                  | 0                     | 0                 | 0                      | 1                  | 0                   |
| <b>IV. Characters of leaf venation:</b>        |                                                                                       |                       |                    |                       |                   |                        |                    |                     |
| 13                                             | Reticulate, (1)/ parallel (0)                                                         | 1                     | 1                  | 1                     | 1                 | 1                      | 0                  | 1                   |
| 14                                             | Distinct (1)/ indistinct [0]                                                          | 1                     | 0                  | 0                     | 1                 | 5                      | 0                  | 0                   |
| 15                                             | White (1)/ green [0]                                                                  | 1                     | 0                  | 1                     | 1                 | 1                      | 1                  | 0                   |
| <b>MICRO-MORPHOLOGICAL CHARACTER:</b>          |                                                                                       |                       |                    |                       |                   |                        |                    |                     |
| <b>V. Shape of epidermal cells:</b>            |                                                                                       |                       |                    |                       |                   |                        |                    |                     |
| 16                                             | Hexagonal-shaped, present (1)/ absent (0)                                             | 1                     | 0                  | 0                     | 1                 | 1                      | 0                  | 1                   |
| 17                                             | Pentagonal-shaped, present (1)/ absent (0)                                            | 1                     | 0                  | 0                     | 1                 | 0                      | 1                  | 1                   |
| 18                                             | Irregular-shaped, present (1)/ absent (0)                                             | 0                     | 1                  | 1                     | 0                 | 1                      | 1                  | 1                   |
| 19                                             | Polygonal-shaped, present (1)/ absent (0)                                             | 0                     | 0                  | 0                     | 1                 | 0                      | 1                  | 0                   |
| 20                                             | Oblong-shaped, present (1)/ absent (0)                                                | 0                     | 0                  | 0                     | 0                 | 1                      | 1                  | 1                   |
| 21                                             | Square-shaped, present (1)/ absent (0)                                                | 0                     | 0                  | 0                     | 0                 | 1                      | 1                  | 1                   |
| <b>VI. Characters of epidermal cell walls:</b> |                                                                                       |                       |                    |                       |                   |                        |                    |                     |
| 22                                             | Thin and warty with reticulated ornamentation, present (1)/ absent (0)                | 1                     | 0                  | 0                     | 0                 | 0                      | 0                  | 0                   |
| 23                                             | Thick and warty with reticulated and undulated ornamentation, present (1)/ absent (0) | 0                     | 2                  | 0                     | 0                 | 0                      | 0                  | 0                   |
| 24                                             | Thick and warty with tuberculated ornamentation, present (1)/ absent (0)              | 0                     | 0                  | 1                     | 0                 | 0                      | 0                  | 0                   |
| 25                                             | Smooth and thin, present (1)/ absent (0)                                              | 0                     | 0                  | 0                     | 1                 | 0                      | 0                  | 0                   |
| 26                                             | Thick and straight with favulariated ornamentation,                                   | 0                     | 0                  | 0                     | 0                 | 1                      | 0                  | 1                   |

|                                                              |                                                                         |   |    |    |   |   |   |   |
|--------------------------------------------------------------|-------------------------------------------------------------------------|---|----|----|---|---|---|---|
|                                                              | present (1)/ absent (0)                                                 |   |    |    |   |   |   |   |
| 27                                                           | Thick and straight, present (1)/ absent (0)                             | 0 | 0  | 0  | 0 | 0 | 1 | 1 |
| 28                                                           | Thick and warty with verricated ornamentation, present (1)/ absent (0)  | 0 | 0  | 0  | 0 | 0 | 0 | 1 |
| <b>VII. Characters of stomata:</b>                           |                                                                         |   |    |    |   |   |   |   |
| 29                                                           | Tricytic, present (1)/ absent (0)                                       | 1 | 0  | I. | 1 | 0 | 0 | 1 |
| 30                                                           | Paracytic, present (1)/ absent (0)                                      | 1 | 1  | I. | 0 | 1 | 0 | 0 |
| 31                                                           | Amphihemiparacytic, present (1)/ absent (0)                             | 1 | 0  | I. | 0 | 1 | 1 | 0 |
| 32                                                           | Pentacytic, present (1)/ absent (0)                                     | 1 | 1  | I. | 0 | 0 | 0 | 0 |
| 33                                                           | Cyclocytic, present (1)/ absent (0)                                     | 1 | 0  | I. | 0 | 1 | 1 | 0 |
| 34                                                           | Parallel-shaped, present (1)/ absent (0)                                | 1 | 1  | I. | 0 | 0 | 0 | 1 |
| 35                                                           | Anisocytic, present (1)/ absent (0)                                     | 1 | 1  | I. | 1 | 0 | 1 | 1 |
| 36                                                           | Tetracytic, present (1)/ absent (0)                                     | 1 | 1  | I. | 0 | 0 | 0 | 1 |
| 37                                                           | Hemiparacytic, present (1)/ absent (0)                                  | 0 | 1  | I. | 1 | 1 | 0 | 1 |
| 38                                                           | Hexacytic, present (1)/ absent (0)                                      | 0 | 1  | I. | 1 | 0 | 0 | 1 |
| 39                                                           | Actinocytic, present (1)/ absent (0)                                    | 0 | 1  | I. | 1 | 1 | 0 | 0 |
| 40                                                           | Associated with middle lamella, present (1)/ absent (0)                 | 0 | 1  | I. | 0 | 0 | 1 | 0 |
| 41                                                           | Associated V-shaped, present (1)/ absent (0)                            | 0 | 1  | I. | 0 | 0 | 1 | 0 |
| <b>VIII. Stomatal levels:</b>                                |                                                                         |   |    |    |   |   |   |   |
| 42                                                           | Semi depressed, present (1)/absent (0)                                  | 1 | 0  | I. | 1 | 0 | 0 | 0 |
| 43                                                           | Raised, present (1)/absent (0)                                          | 0 | 1  | I. | 0 | 0 | 0 | 0 |
| 44                                                           | Superficial, present (1)/absent (0)                                     | 0 | 0  | I. | 0 | 0 | 0 | 1 |
| 45                                                           | Depressed, present (1)/absent (0)                                       | 0 | 0  | I. | 0 | 1 | 0 | 0 |
| 46                                                           | Semi-raised, present (1)/absent (0)                                     | 0 | 0  | I. | 0 | 0 | 1 | 0 |
| <b>IX. Characters of trichomes:</b>                          |                                                                         |   |    |    |   |   |   |   |
| <b>IX.1. Non-glandular:</b>                                  |                                                                         |   |    |    |   |   |   |   |
| 47                                                           | Papillae, present (1)/absent (0)                                        | 0 | I. | 1  | 0 | 0 | 1 | 0 |
| 48                                                           | Unicellular with acute apex, present (1)/absent (0)                     | 0 | I. | 0  | 0 | 0 | 0 | 0 |
| 49                                                           | Unicellular with hooked apex, present (1)/absent (0)                    | 1 | 0  | 1  | 0 | 0 | 1 | 0 |
| 50                                                           | Bicellular with rounded apex, present (1)/absent (0)                    | 1 | 0  | 1  | 1 | 1 | 0 | 0 |
| 51                                                           | Multicellular with bent apex, present (1)/absent (0)                    | 1 | 0  | 1  | 1 | 1 | 0 | 1 |
| 52                                                           | Multicellular with rounded apex, present (1)/absent (0)                 | 1 | 0  | 1  | 1 | 1 | 0 | 1 |
| <b>IX.2. Glandular hairs:</b>                                |                                                                         |   |    |    |   |   |   |   |
| 53                                                           | Unicellular, present (1)/ absent (0)                                    | 1 | 0  | 1  | 0 | 1 | 1 | 0 |
| 54                                                           | Bicellular, present (1)/ absent (0)                                     | 1 | 0  | 0  | 1 | 0 | 1 | 1 |
| 55                                                           | Multicellular, present (1)/ absent (0)                                  | 1 | 0  | 1  | 0 | 1 | 1 | 1 |
| <b>X. Character of leaf-blade anatomy, epidermal layers:</b> |                                                                         |   |    |    |   |   |   |   |
| 56                                                           | Simple (1)/ multiple (0).                                               | 1 | 0  | 0  | 1 | 1 | 1 | 1 |
| 57                                                           | Smooth with thin cuticle layer (1)/ rough with thick cuticle layer [0]. | 1 | 1  | 0  | 1 | 1 | 0 | 1 |
| <b>XI. Characters of mesophyll tissue:</b>                   |                                                                         |   |    |    |   |   |   |   |
| <b>XI.1. Palisade tissue:</b>                                |                                                                         |   |    |    |   |   |   |   |
| 58                                                           | Monolateral with one continuous row, present (1)/ absent                | 1 | 0  | 0  | 0 | 0 | 0 | 1 |

|                                         |                                                                       |   |   |   |   |   |   |   |   |
|-----------------------------------------|-----------------------------------------------------------------------|---|---|---|---|---|---|---|---|
|                                         | (0)                                                                   |   |   |   |   |   |   |   |   |
| 59                                      | Monolateral with more than continuous row, present (1)/<br>absent (0) | 0 | 1 | 0 | 0 | 1 | 1 | 0 | 0 |
| 60                                      | Bilateral with more than separated row, present (1)/<br>absent (0)    | 0 | 0 | 1 | 0 | 0 | 0 | 0 | 0 |
| 61                                      | Monolateral with more than separated row, present (1)/<br>absent (0)  | 0 | 0 | 0 | 1 | 0 | 0 | 0 | 0 |
| 62                                      | Mucilage cells, present (1)/ absent (0)                               | 0 | 1 | 0 | 0 | 0 | 0 | 1 | 1 |
| 63                                      | Rosette crystals, present (1)/ absent (0)                             | 0 | 1 | 1 | 1 | 0 | 1 | 1 | 0 |
| 64                                      | Prismatic crystals, present (1)/ absent (0)                           | 0 | 0 | 1 | 0 | 0 | 1 | 1 | 0 |
| 65                                      | Resin canals, present (1)/ absent (0)                                 | 0 | 0 | 1 | 1 | 0 | 0 | 0 | 1 |
| <b>XI.2. Spongy tissue:</b>             |                                                                       |   |   |   |   |   |   |   |   |
| 66                                      | Armed parenchyma tissue, present (1)/ absent (0)                      | 1 | 1 | 1 | 0 | 0 | 1 | 1 | 0 |
| 67                                      | Aerenchyma tissue, present (1)/ absent (0)                            | 0 | 1 | 1 | 0 | 0 | 1 | 1 | 0 |
| 68                                      | Rosette crystals, present (1)/ absent (0)                             | 0 | 0 | 1 | 1 | 1 | 1 | 1 | 1 |
| 69                                      | Laticifer tissue, present (1)/ absent (0)                             | 1 | 0 | 1 | 1 | 1 | 1 | 1 | 1 |
| 70                                      | Secretory cells, present (1)/ absent (0)                              | 0 | 1 | 1 | 0 | 0 | 0 | 1 | 0 |
| <b>XII. Characters of midrib zone:</b>  |                                                                       |   |   |   |   |   |   |   |   |
| <b>XII.1. Upper surface</b>             |                                                                       |   |   |   |   |   |   |   |   |
| 71                                      | Convex, present (1)/ absent (0)                                       | 1 | 1 | 0 | 0 | 0 | 0 | 0 | 0 |
| 72                                      | Concave, present (1)/ absent (0)                                      | 0 | 0 | 1 | 1 | 0 | 1 | 1 | 0 |
| 73                                      | Straight, present (1)/ absent (0)                                     | 0 | 0 | 0 | 0 | 1 | 0 | 0 | 1 |
| <b>XII.2. Lower surface</b>             |                                                                       |   |   |   |   |   |   |   |   |
| 74                                      | Concave, (1)/ semi straightness (0)                                   | 1 | 0 | 1 | 1 | 1 | 1 | 1 | 1 |
| <b>XII.3. Contained:</b>                |                                                                       |   |   |   |   |   |   |   |   |
| 75                                      | Collenchyma tissue, present (1)/ absent (0)                           | 1 | 1 | 1 | 1 | 1 | 0 | 1 | 1 |
| 76                                      | Aerenchyma tissue, present (1)/ absent (0)                            | 0 | 0 | 1 | 0 | 0 | 1 | 1 | 1 |
| 77                                      | Rosette crystals, present (1)/ absent (0)                             | 1 | 0 | 1 | 1 | 0 | 1 | 1 | 1 |
| 78                                      | Prismatic crystals, present (1)/ absent (0)                           | 0 | 1 | 1 | 1 | 1 | 0 | 1 | 1 |
| 79                                      | Secretory cells, present (1)/ absent (0)                              | 0 | 0 | 0 | 0 | 0 | 0 | 1 | 0 |
| <b>XIII. Shape of vascular bundles:</b> |                                                                       |   |   |   |   |   |   |   |   |
| 80                                      | Crescent, (1)/ slightly concavity (0)                                 | 1 | 1 | 1 | 1 | 1 | 1 | 0 | 1 |

\*I.: Indistinct.

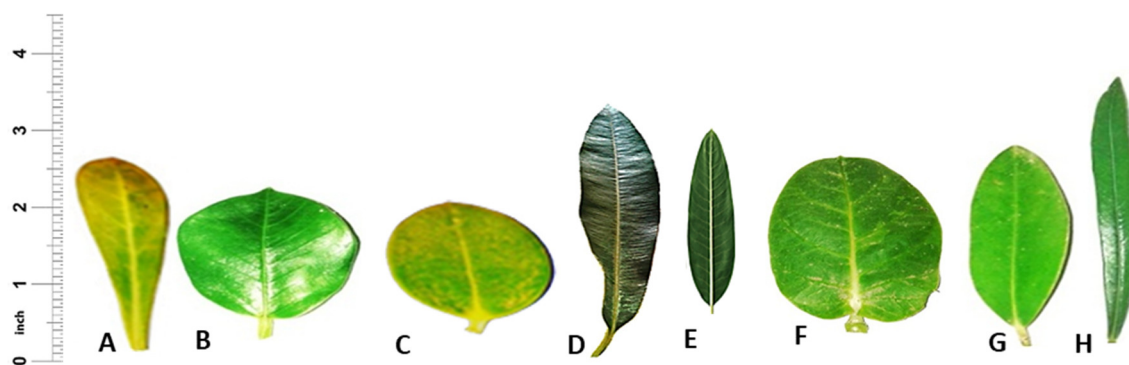

**Figure S1.** Leaf morphology of the studied Apocynaceae plants. A: *A. obesum*, B: *D. boliviensis*, C: *C. carandas*, D: *N. oleander*, E: *A. curassavica*, F: *C. procera*, G: *A. oblongifolia*, and H: *T. neriifolia*.
